# Supplementary material for: Parental Influence on Child and Adolescent Physical Activity Level: A Meta-Analysis
Source: MDPI journal article supplement (doi:10.3390/ijerph192416861), 2022-12-15
Supplement: s1 [file s1]

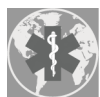

## Appendix C

### Study Quality

Table A4 Risk of Bias Assessment Criterion Items

| Risk of Bias Assessment Criterion |                                                                                                                                       |
|-----------------------------------|---------------------------------------------------------------------------------------------------------------------------------------|
| 1                                 | Participants are randomly selected                                                                                                    |
| 2                                 | Sample sizes are adequate                                                                                                             |
| 3                                 | Participants are representative of various demographic groups                                                                         |
| 4                                 | Exclusion of participants and justification                                                                                           |
| 5                                 | Group comparisons are made on other meaningful demographics                                                                           |
| 6                                 | Validated measures are used or authors have provided sufficient supportive information on psychometric properties they devised        |
| 7                                 | Measures used were defined and appropriate                                                                                            |
| 8                                 | Authors have examined whether dropouts are random or not (longitudinal/prospective study)                                             |
| 9                                 | Drop-out rate was not high and missing data was treated appropriately (longitudinal/prospective design)                               |
| 10                                | allocation sequence generated to produce comparable groups (experimental design only)                                                 |
| 11                                | allocation was concealed (experimental design only)                                                                                   |
| 12                                | whether blinding was done; and if so, whether it was effective (experimental design only)                                             |
| 13                                | Outcome data for all outcomes were reported; incomplete outcomes due to attrition and exclusions were addressed (experimental design) |
| 14                                | no selective outcome reporting (experimental design)                                                                                  |
| 15                                | Other sources of bias (experimental design)                                                                                           |

Table A5 Risk of Bias Assessment Results

[illegible]





|                              |     |     |     |     |     |     |     |    |     |    |    |    |    |    |    |                               |
|------------------------------|-----|-----|-----|-----|-----|-----|-----|----|-----|----|----|----|----|----|----|-------------------------------|
| Farias Júnior et al. (2014)  | yes | yes | yes | yes | yes | yes | no  | na | na  | na | na | na | na | na | na | having potential risk of bias |
| Gonzalez-Cutre et al. (2014) | no  | yes | no  | no  | no  | yes | yes | na | na  | na | na | na | na | na | na | having potential risk of bias |
| Langer et al. (2014)         | yes | na | na  | na | na | na | na | na | na | low risk                      |
| Lawman and Wilson (2014)     | yes | na | na  | na | na | na | na | na | na | low risk                      |
| Lloyd et al. (2014)          | yes | na | na  | na | na | na | na | na | na | low risk                      |
| Määttä et al. (2014)         | no  | yes | yes | no  | no  | yes | yes | na | na  | na | na | na | na | na | na | having potential risk of bias |
| (Silva et al., 2014)         | no  | yes | no  | no  | no  | yes | yes | na | na  | na | na | na | na | na | na | having potential risk of bias |
| Ling et al. (2015)           | yes | na | na  | na | na | na | na | na | na | low risk                      |
| Rhodes et al. (2015)         | yes | yes | yes | no  | no  | yes | yes | no | yes | na | na | na | na | na | na | having potential risk of bias |
| Schoeppe and Trost (2015)    | yes | na | na  | na | na | na | na | na | na | low risk                      |
| Tate et al. (2015)           | yes | na | na  | na | na | na | na | na | na | low risk                      |
| Gontarev and Kalac (2016)    | yes | na | na  | na | na | na | na | na | na | low risk                      |
| Gontarev et al. (2016)       | yes | na | na  | na | na | na | na | na | na | low risk                      |
| Lee et al. (2016)            | yes | na | na  | na | na | na | na | na | na | low risk                      |
| McMurray et al. (2016)       | yes | na | na  | na | na | na | na | na | na | low risk                      |
| Silva et al. (2016)          | yes | na | na  | na | na | na | na | na | na | low risk                      |
| Van Kann et al. (2016)       | yes | na | na  | na | na | na | na | na | na | low risk                      |
| Verloigne et al. (2016)      | no  | yes | yes | no  | no  | no  | yes | na | na  | na | na | na | na | na | na | having potential risk of bias |
| Wing et al. (2016)           | no  | yes | yes | no  | no  | yes | yes | na | na  | na | na | na | na | na | na | having potential risk of bias |

[illegible]

|                           |     |     |     |     |     |     |     |    |     |    |    |    |    |    |    |                               |
|---------------------------|-----|-----|-----|-----|-----|-----|-----|----|-----|----|----|----|----|----|----|-------------------------------|
| Biggs et al. (2019)       | no  | yes | no  | yes | no  | yes | yes | na | na  | na | na | na | na | na | na | having potential risk of bias |
| Colabianchi et al. (2019) | yes | na | na  | na | na | na | na | na | na | low risk                      |
| Costa et al. (2019)       | no  | yes | no  | no  | yes | no  | yes | na | na  | na | na | na | na | na | na | having potential risk of bias |
| Courtney et al. (2019)    | no  | no  | yes | no  | yes | no  | yes | na | na  | na | na | na | na | na | na | having potential risk of bias |
| George et al. (2019)      | yes | yes | yes | no  | yes | yes | yes | na | na  | na | na | na | na | na | na | having potential risk of bias |
| Haidar et al. (2019)      | no  | yes | yes | no  | no  | no  | yes | na | na  | na | na | na | na | na | na | having potential risk of bias |
| Kobayashi et al. (2019)   | yes | na | na  | na | na | na | na | na | na | low risk                      |
| Lu et al. (2019)          | yes | na | na  | na | na | na | na | na | na | low risk                      |
| Mikalsen et al. (2019)    | yes | na | na  | na | na | na | na | na | na | low risk                      |
| Parker et al. (2019)      | no  | yes | no  | yes | yes | no  | yes | na | na  | na | na | na | na | na | na | having potential risk of bias |
| Qurban et al. (2019)      | no  | yes | no  | no  | no  | yes | yes | na | na  | na | na | na | na | na | na | having potential risk of bias |
| Wang et al. (2019)        | yes | na | na  | na | na | na | na | na | na | low risk                      |
| Welch et al. (2019)       | yes | na | na  | na | na | na | na | na | na | low risk                      |
| Centeio et al. (2020)     | yes | na | na  | na | na | na | na | na | na | low risk                      |
| Lee and Lee (2020)        | yes | na | na  | na | na | na | na | na | na | low risk                      |
| Park and Park (2020)      | yes | na | na  | na | na | na | na | na | na | low risk                      |
| Ren et al. (2020)         | yes | na | na  | na | na | na | na | na | na | low risk                      |
| Sanz-Martín (2020)        | yes | na | na  | na | na | na | na | na | na | low risk                      |
| Zarychta et al. (2020)    | no  | yes | yes | yes | no  | yes | yes | no | yes | na | na | na | na | na | na | having potential risk of bias |
