# Supplementary material for: Parental Influence on Child and Adolescent Physical Activity Level: A Meta-Analysis
Source: MDPI journal article supplement (doi:10.3390/ijerph192416861), 2022-12-15
Supplement: s1 [file s1]

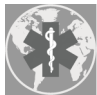

## Appendix A

### Search String

The below search string was searched in PsycInfo, Web of Science, Pubmed, ProQuest and SPORTDiscus without a year limit, and only filters of English were used.

"physical\* activit\*" OR "exercise" OR "sport" OR "movement\*" OR "fitness" OR "moderate to vigorous PA" 【AND】 "father" OR "mother" OR "parent\*" OR "paternal" OR "maternal"【OR】"reinforcement" OR "affiliation" OR "punishment" OR "dysfunction" OR "parent\* encouragement" OR "social support" OR "social influence" OR "role of significant others" OR "determinants" 【OR】 "parental support" OR "parental role" OR "parent\* influence\*" OR "perceived support from parent" OR "parent's reports of direct support" OR "parental promot\*" OR "parental correlates" 【OR】 "support from family" OR "family support" OR "family social support" OR "activity-related support" OR "parental restriction" OR "parental perceptions" 【AND】 "child\*" OR "adolescen\*" OR "youth" OR "student\*" OR "young" OR "school-age" OR "teenage\*" OR "preadolescent" OR "preschool\*" OR "schoolchildren" 【NOT】 "disorder" OR "autism" OR "cancer" OR "diabetes" OR "disabilit"
